# Supplementary material
Source: publisher figshare collection journal article supplement (https://frontiersin.figshare.com/ndownloader/files/22202703)
Supplement: Supplementary file 1 [file 22202703]

Supplementary Material


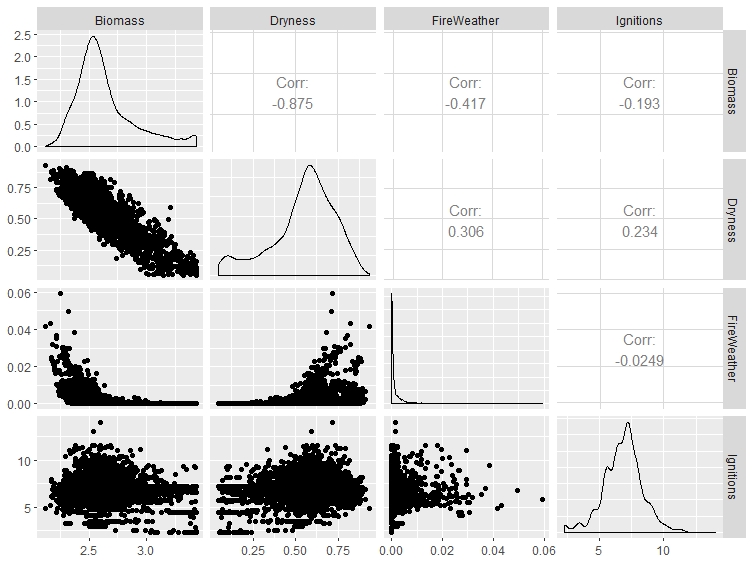


**Supplementary Figure 1.** Correlation matrix for four major determinants of fire in forests. Units are: a) log steady state litter fuel load in t ha-1; b) proportion of the fire season where PET > precipitation; c) proportion of the fire season where FFDI > 50; d) log ignitions per fire season.


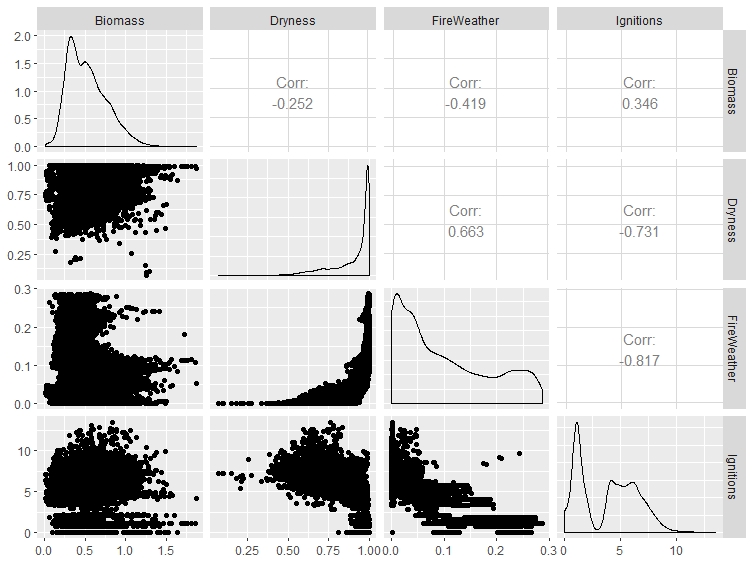


**Supplementary Figure 2.** Correlation matrix for four major determinants of fire in grasslands. Units are: a) log mean annual grass biomass in t ha-1; b) proportion of the fire season where PET > precipitation; c) proportion of the fire season where FFDI > 50; d) log ignitions per fire season.


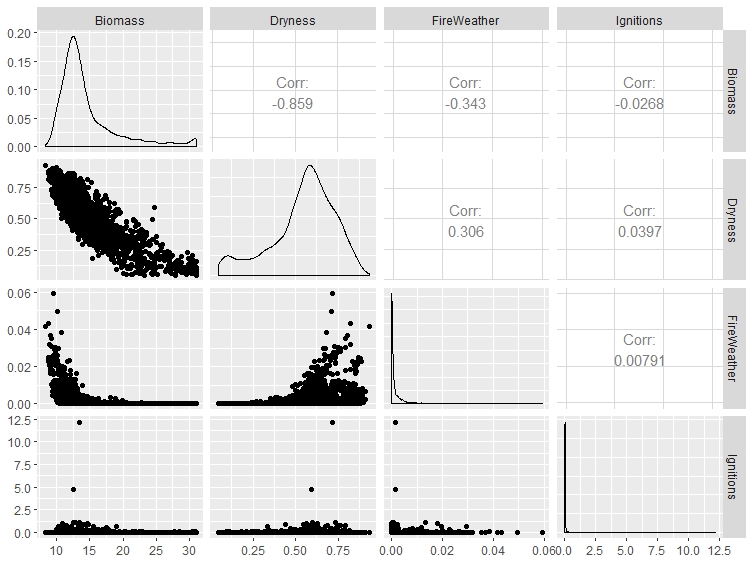


**Supplementary Figure 3.** As for Figure 1, but with biomass and ignitions untransformed. Units are: a) steady state litter fuel load in t ha-1; b) proportion of the fire season where PET > precipitation; c) proportion of the fire season where FFDI > 50; d) ignitions per fire season.


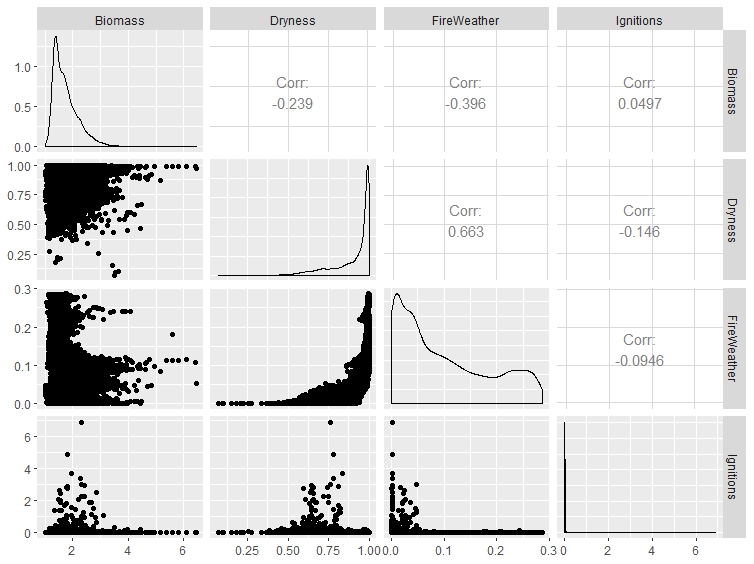


**Supplementary Figure 4.** As for Figure 2, but with biomass and ignitions untransformed. Units are: a) mean annual grass biomass in t ha-1; b) proportion of the fire season where PET > precipitation; c) proportion of the fire season where FFDI > 50; d) ignitions per fire season.
